# Supplementary figures and images for: Fumarate hydratase inactivation in hereditary leiomyomatosis and renal cell cancer is synthetic lethal with ferroptosis induction
Source: PubMed Central journal article supplement — Cancer Sci. 2018 Jul 20;109(9):2757–66. doi: 10.1111/cas.13701 (PMC6125459; doi:10.1111/cas.13701), 2018-07-20

**Fig S1A**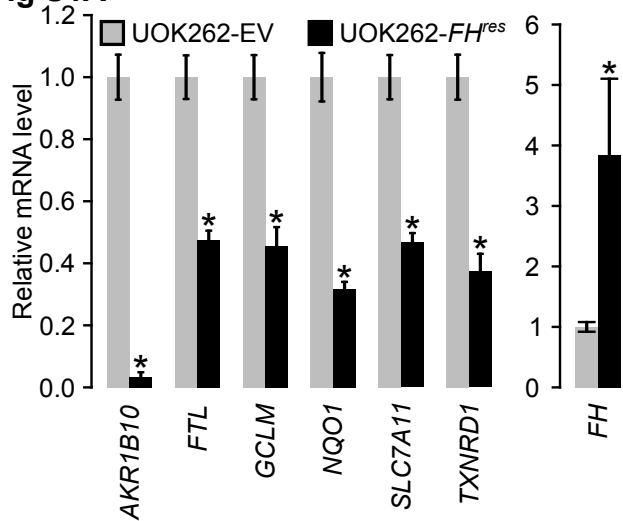**Fig S1B**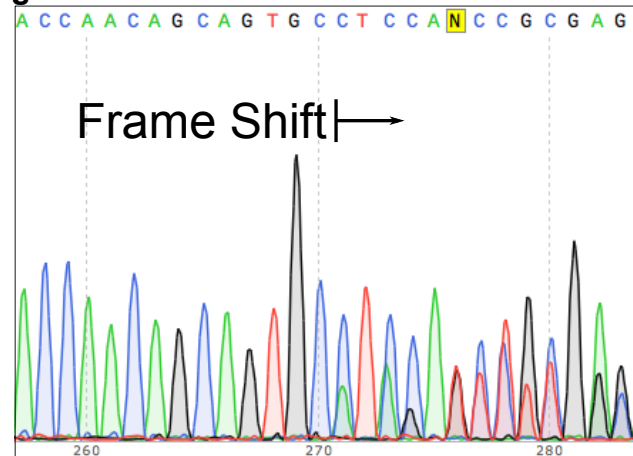**Fig S1C**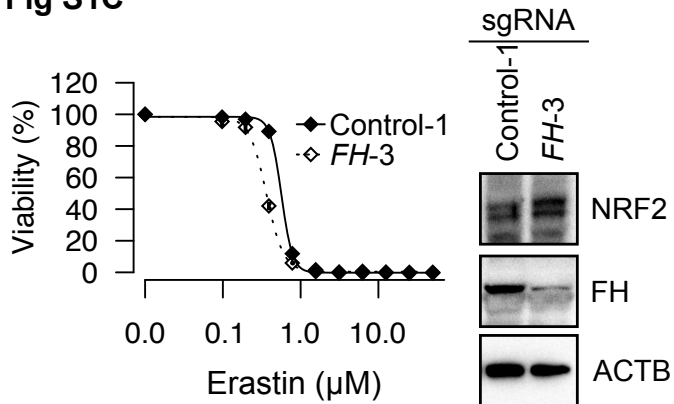**Fig S1D**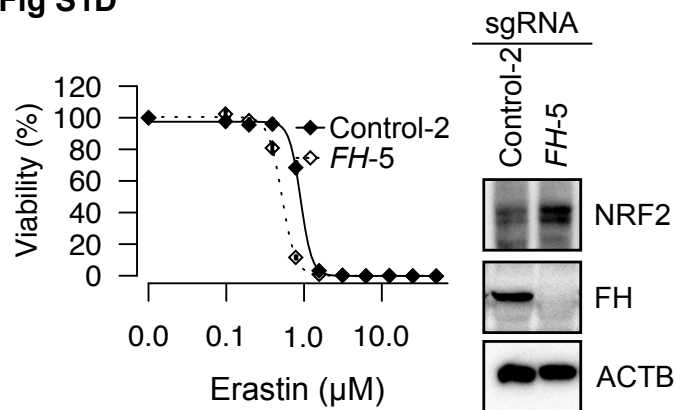

Supplement: CAS-109-2757-s001.pdf [file CAS-109-2757-s001.pdf]

**Fig S2A**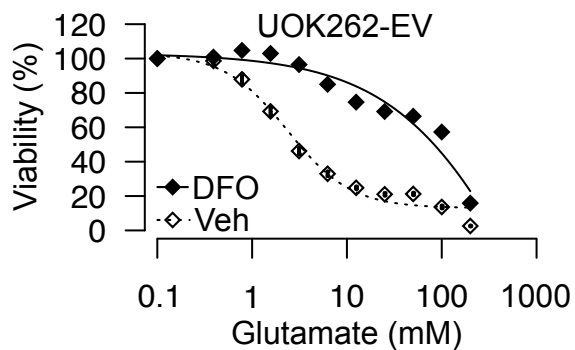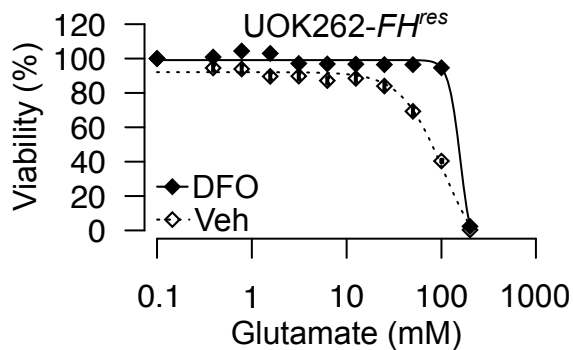**Fig S2B**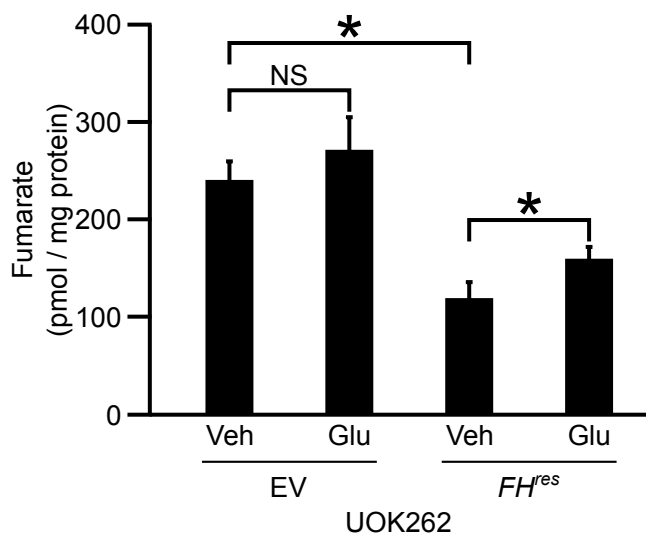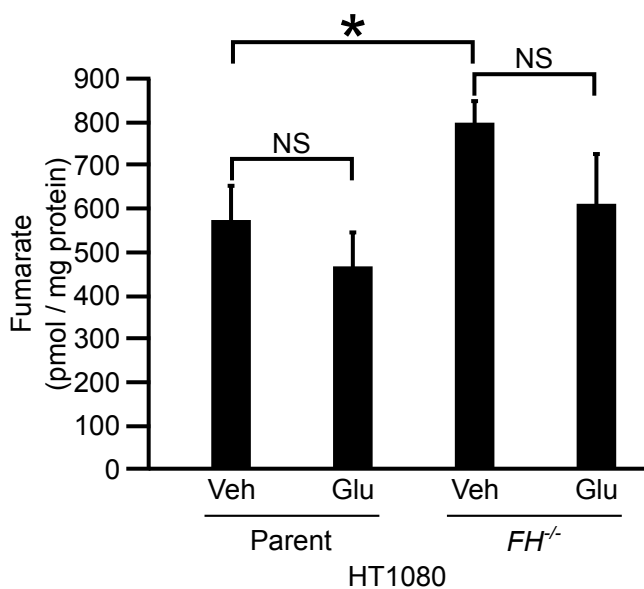**Fig S2C**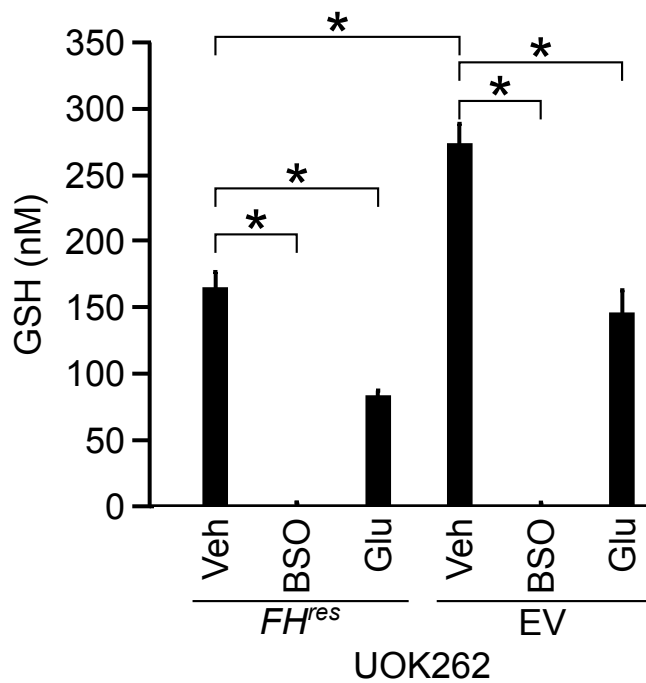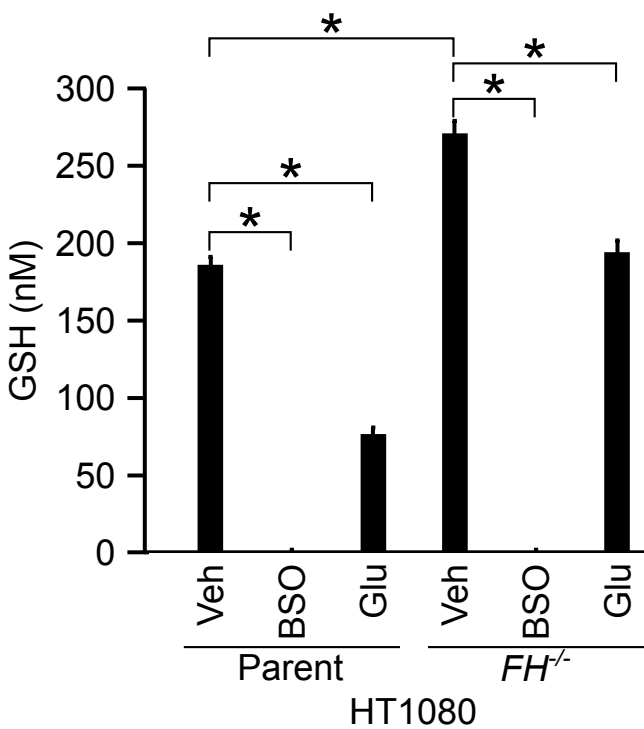**Fig S2D**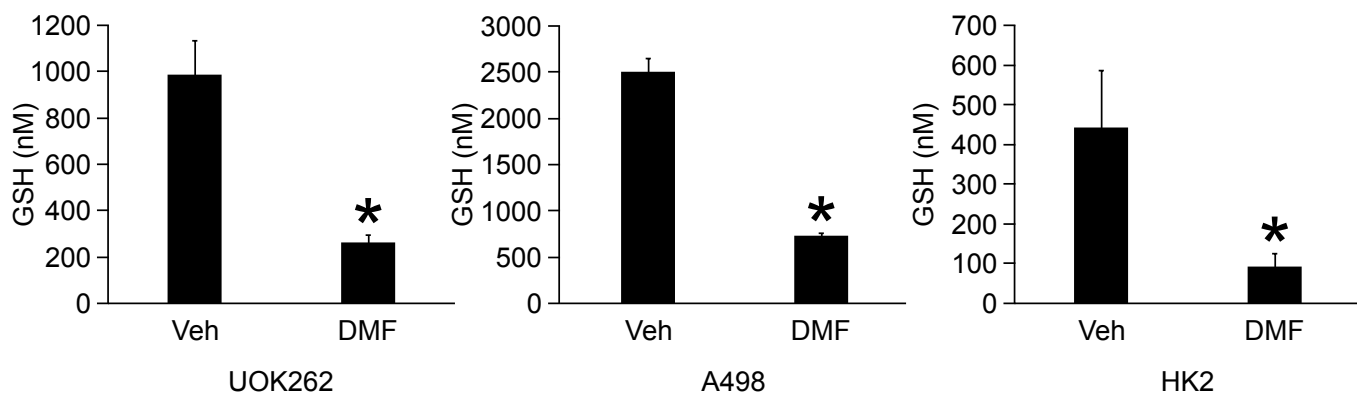

Supplement: CAS-109-2757-s002.pdf [file CAS-109-2757-s002.pdf]

**Fig S3A**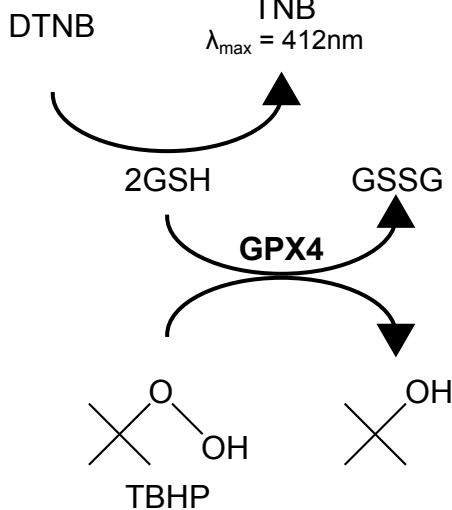**Fig S3B**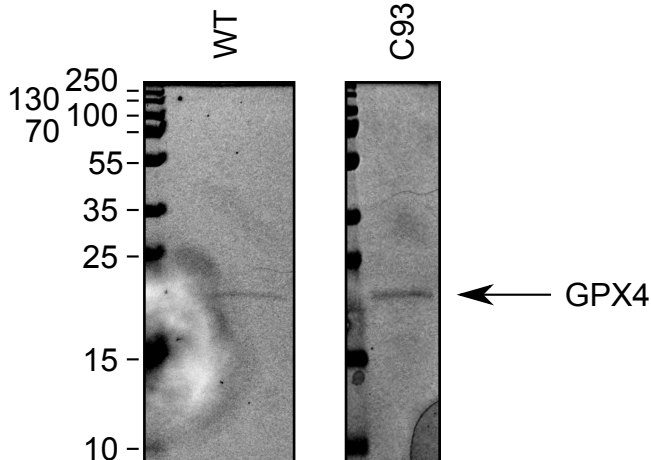**Fig S3C**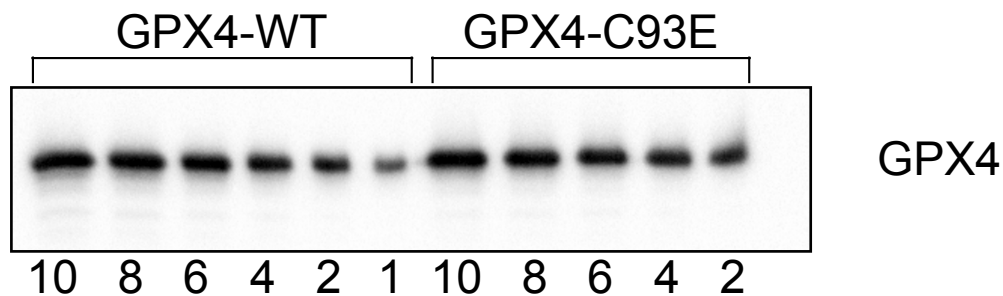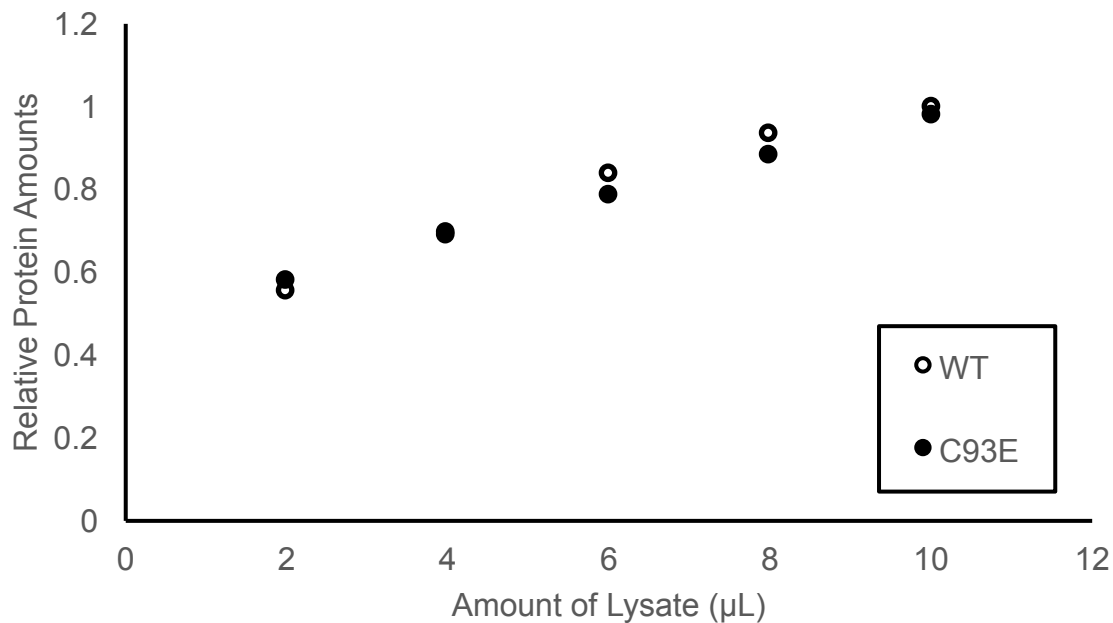

Supplement: CAS-109-2757-s003.pdf [file CAS-109-2757-s003.pdf]
